# Supplementary figures and images for: The Cost and the Value of Stroke Care in Greece: Results from the SUN4P Study
Source: MDPI journal article supplement (doi:10.3390/healthcare11182545), 2023-09-14

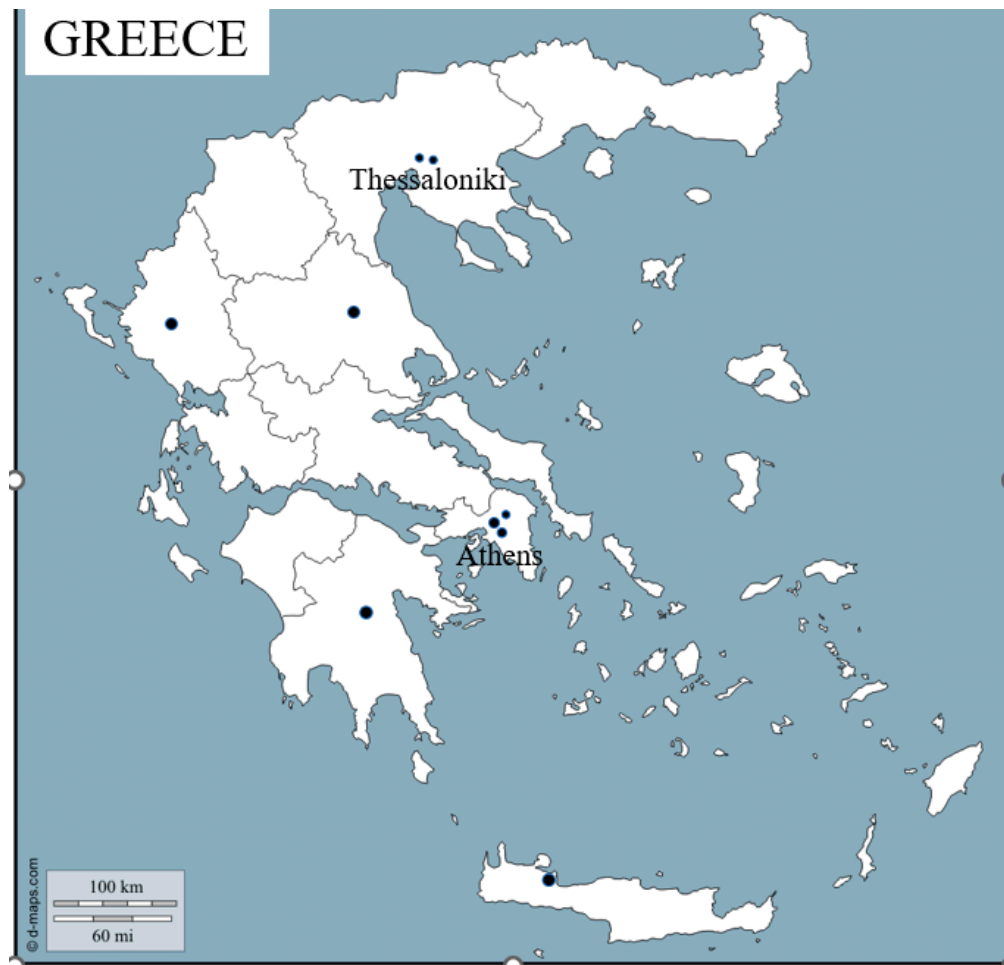

**Figure S1.** Sites of participating study centers.

Supplement: s1 [file s1]
